# Supplementary material for: Radiation inducible MafB gene is required for thymic regeneration
Source: PubMed Central journal article supplement (PMC8129107; doi:10.1038/s41598-021-89836-7), 2021-05-17

**GFP (MafB)**

**CD31**

**GFP and CD31**

**a**

**b**

**c**

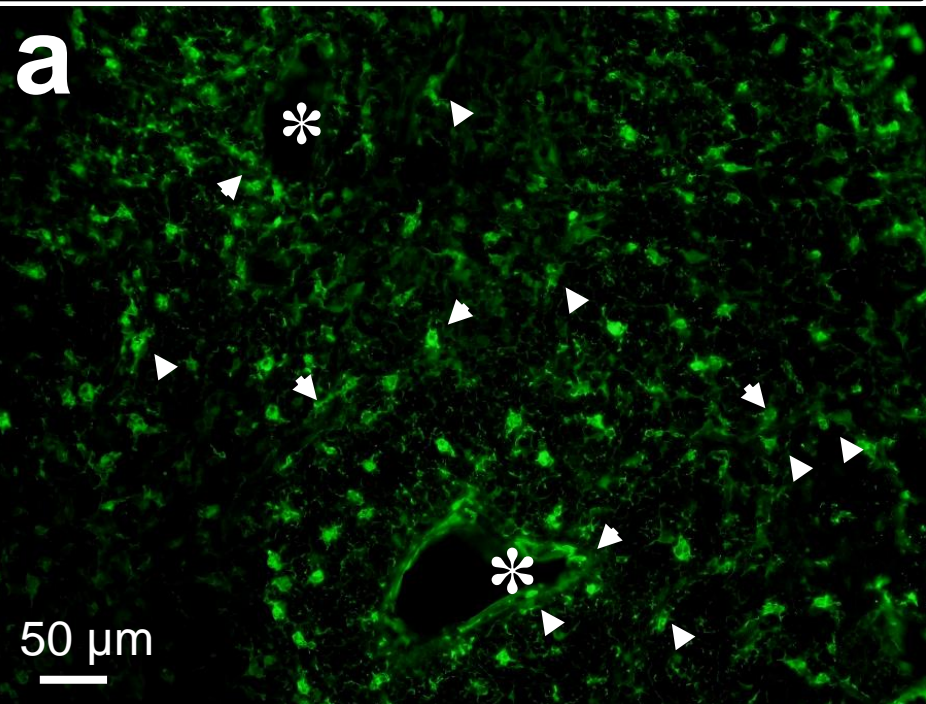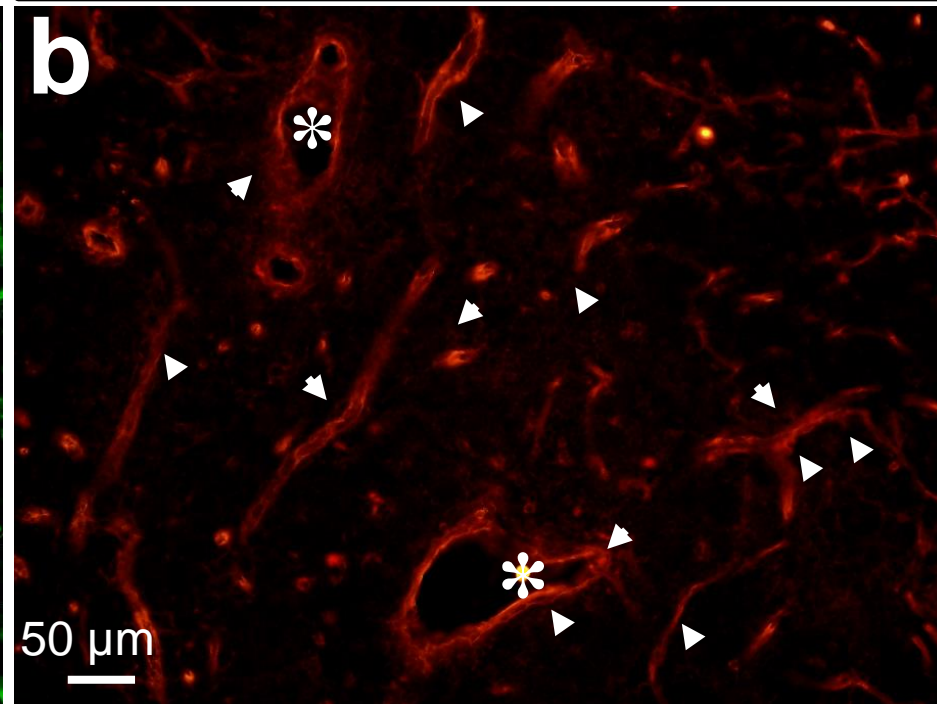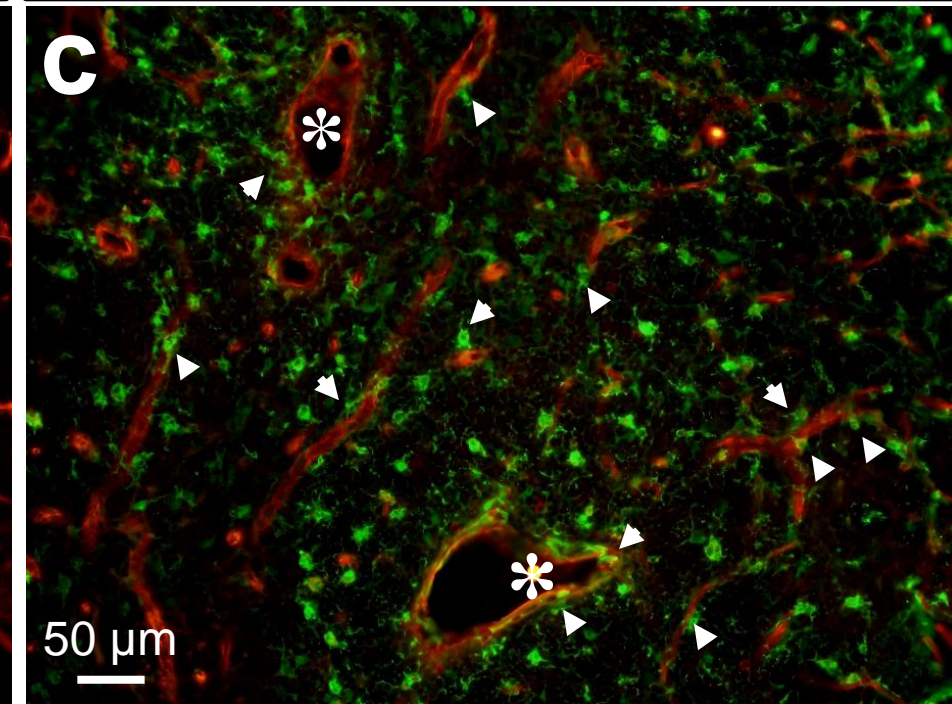

Supplement: 41598_2021_89836_MOESM2_ESM.pdf [file 41598_2021_89836_MOESM2_ESM.pdf]
