# Supplementary material for: Radiation inducible MafB gene is required for thymic regeneration
Source: PubMed Central journal article supplement (PMC8129107; doi:10.1038/s41598-021-89836-7), 2021-05-17

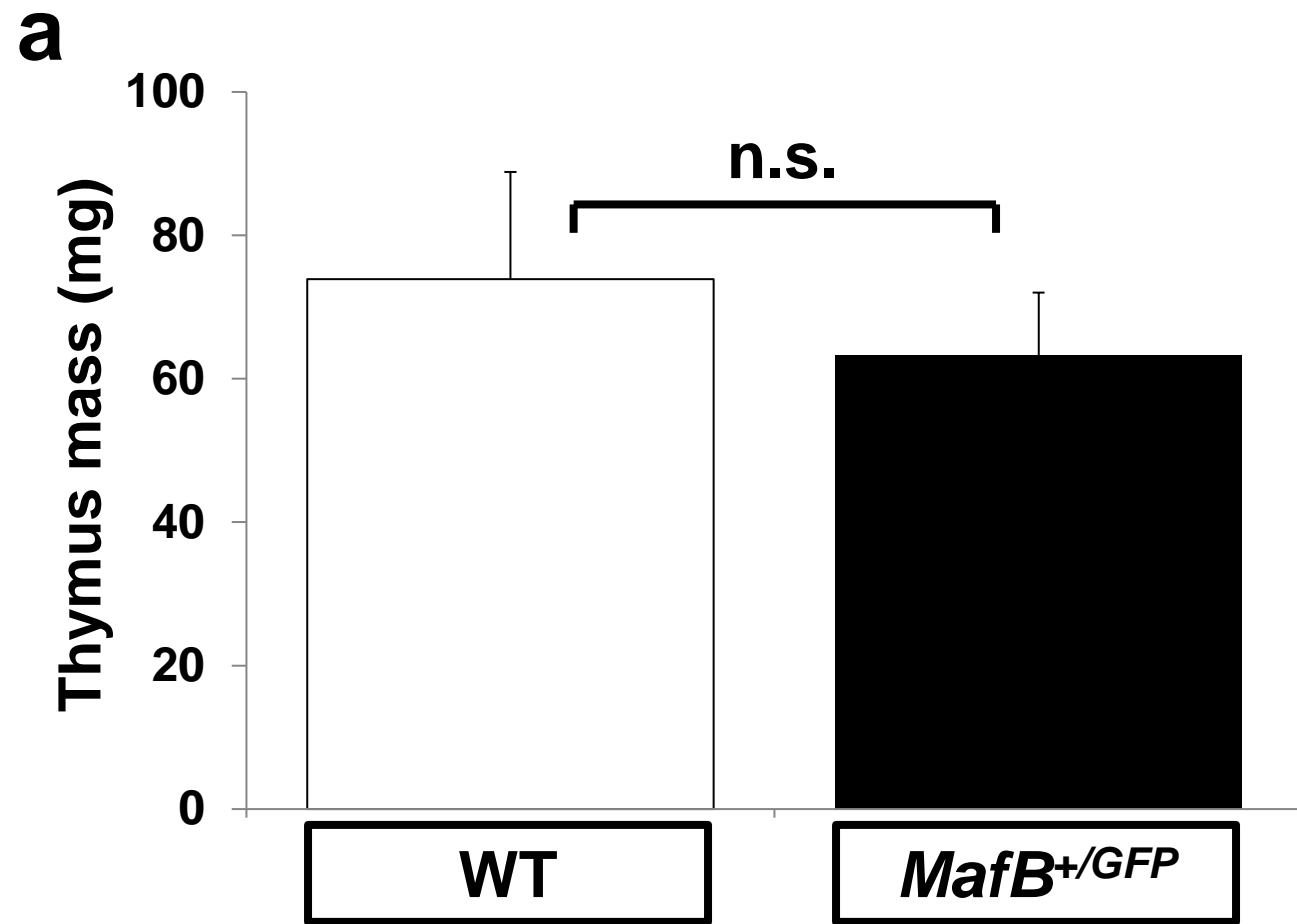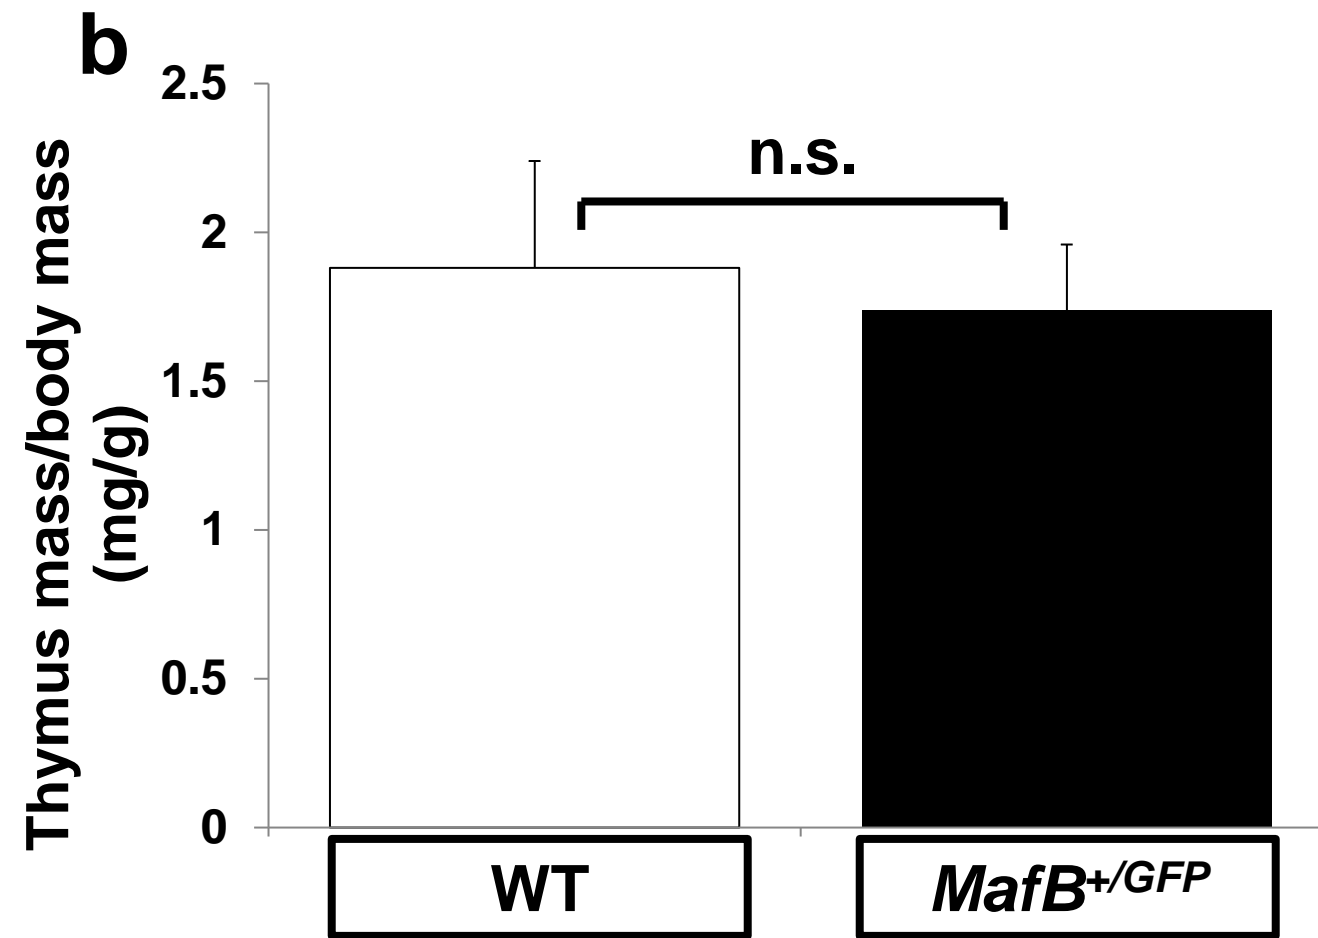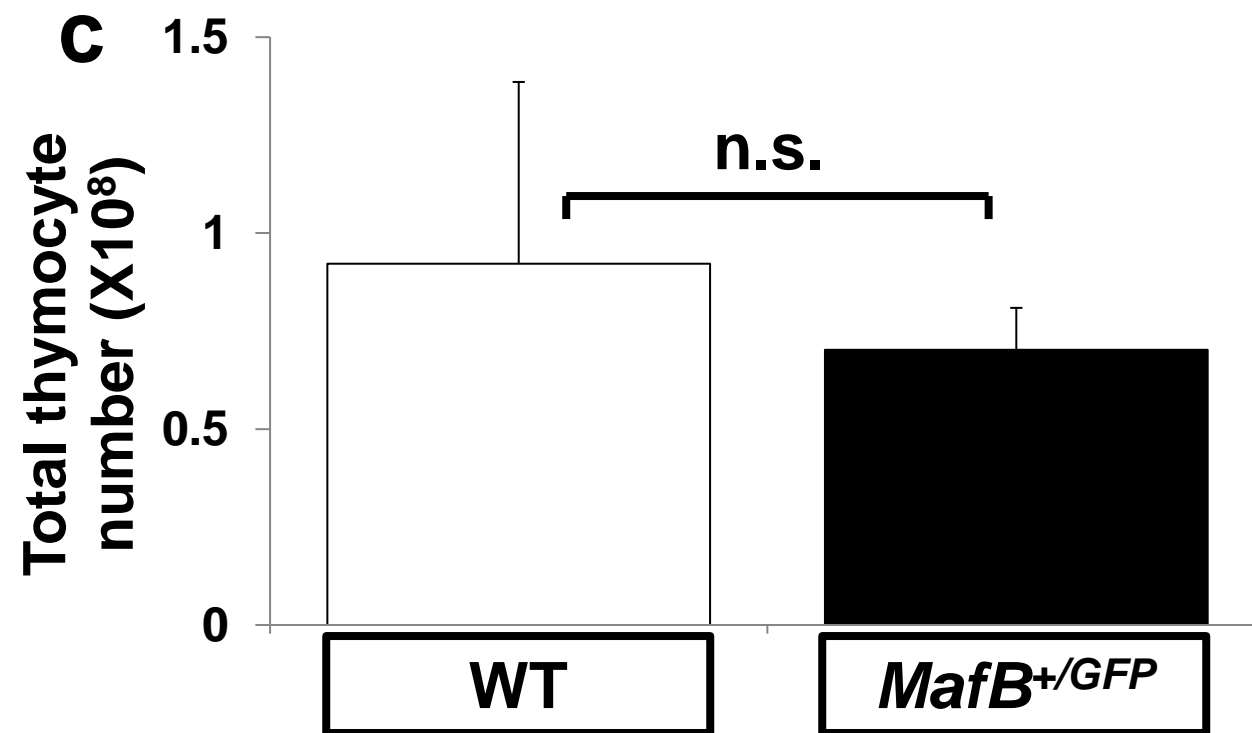

Supplement: 41598_2021_89836_MOESM3_ESM.pdf [file 41598_2021_89836_MOESM3_ESM.pdf]
