# Supplementary material for: Radiation inducible MafB gene is required for thymic regeneration
Source: PubMed Central journal article supplement (PMC8129107; doi:10.1038/s41598-021-89836-7), 2021-05-17

**Untreated**

**SL-TBI**

**WT**

**a**

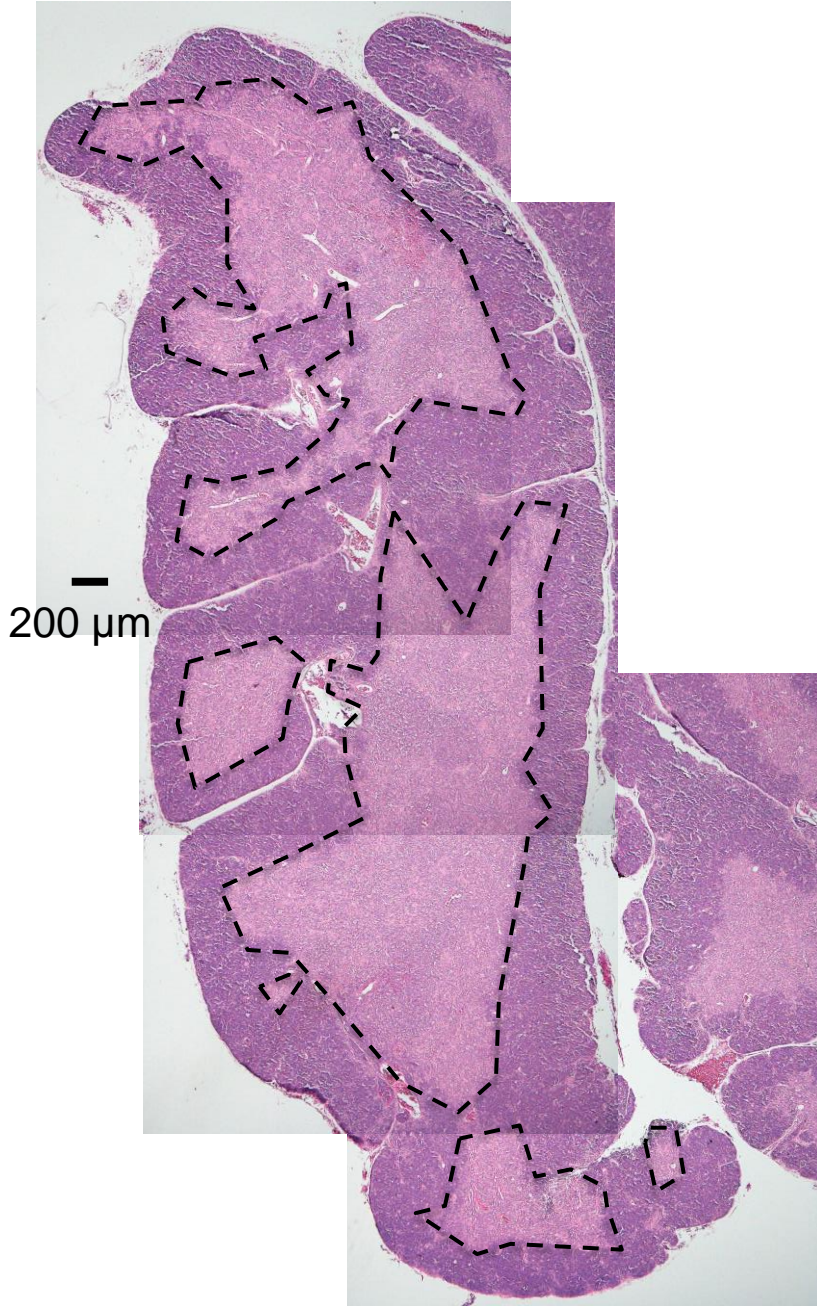

**c**

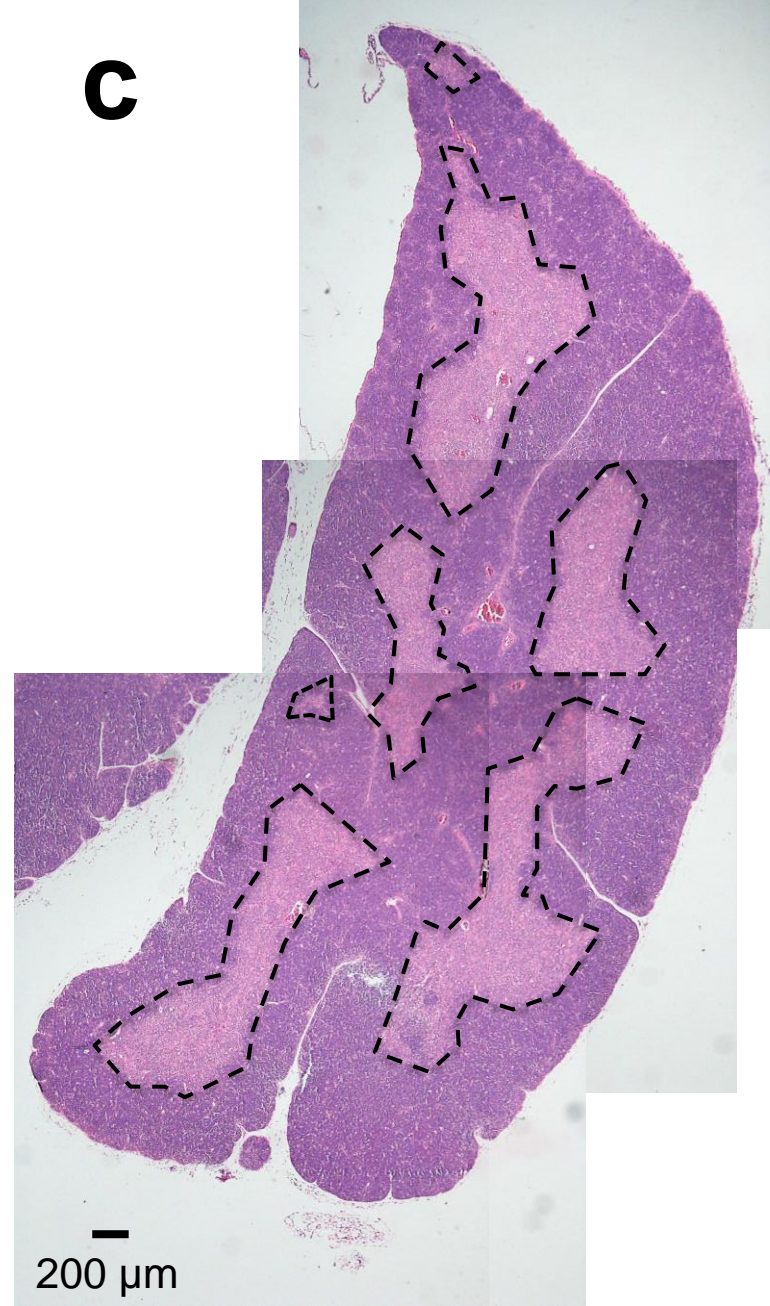

***MafB*<sup>+/-</sup>GFP**

**b**

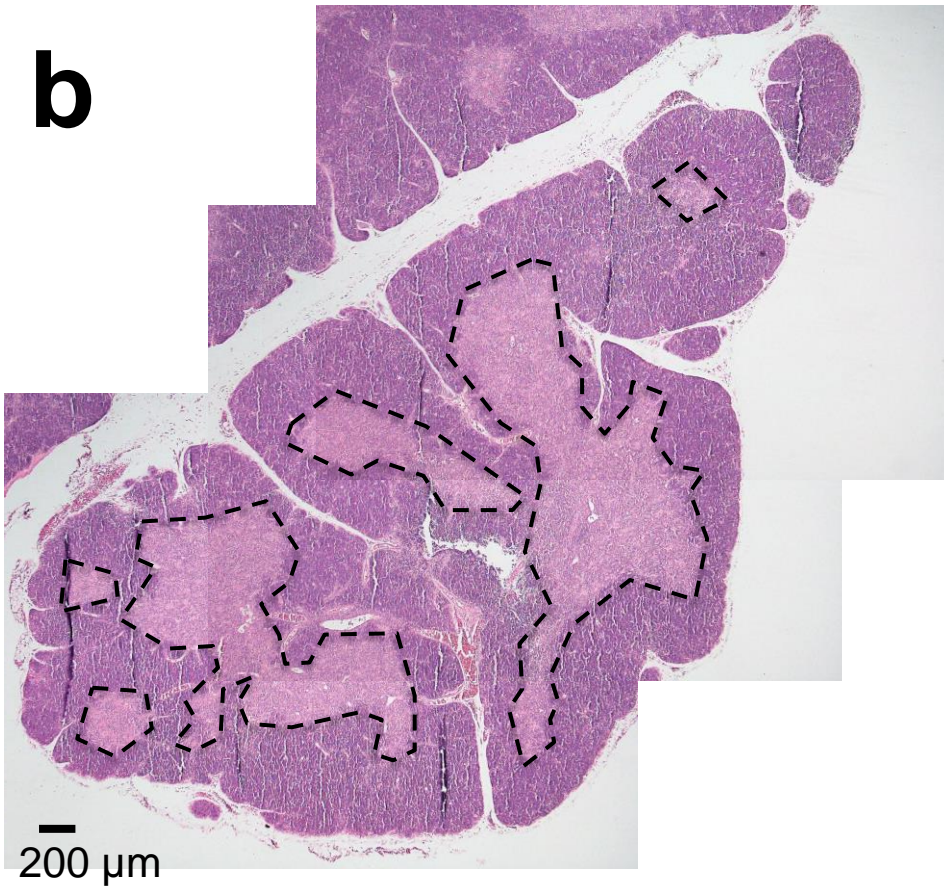

**d**

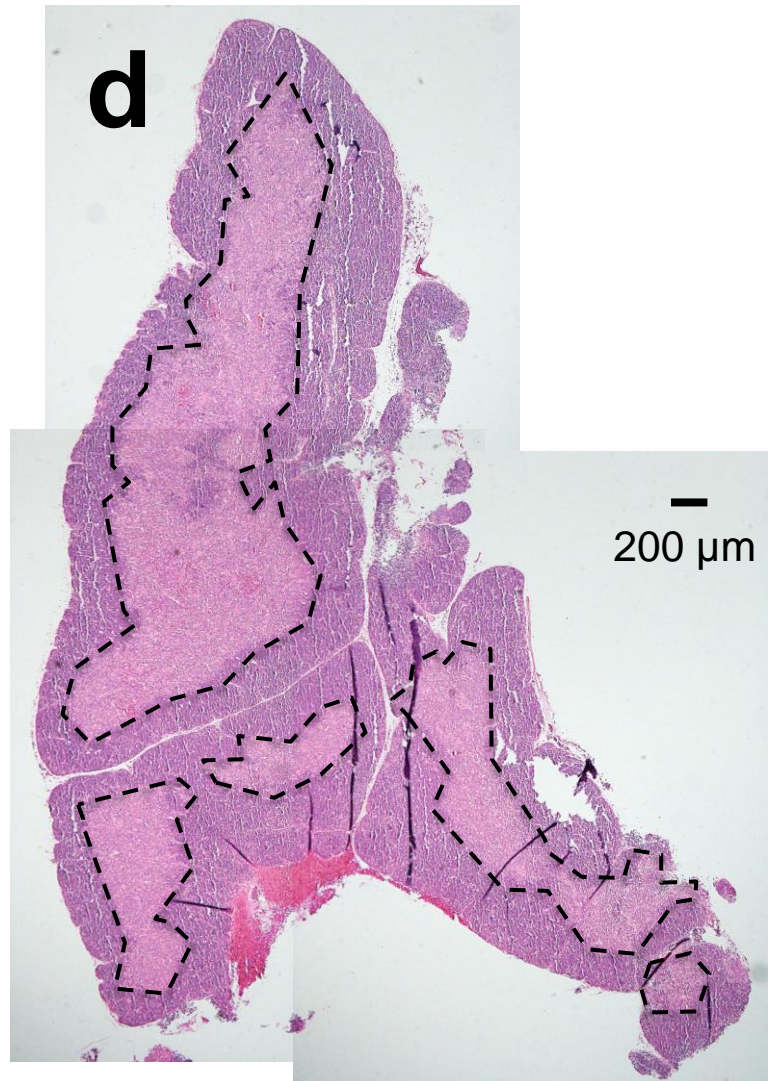

Supplement: 41598_2021_89836_MOESM4_ESM.pdf [file 41598_2021_89836_MOESM4_ESM.pdf]
